# Supplementary material
Source: PubMed Central journal article supplement (PMC9301964)
Supplement: NIHMS1669438-supplement-IGRA_Peds_Manuscript_Supplementary_Material.pdf [file NIHMS1669438-supplement-IGRA_Peds_Manuscript_Supplementary_Material.pdf]

## Supplemental Information

**SUPPLEMENTAL TABLE 6** Countries With High Incidence Rates of Tuberculosis (>100 Cases per 100 000 Person-Years)

| Country                        | Country               | Country         |
|--------------------------------|-----------------------|-----------------|
| Afghanistan                    | Guinea                | Senegal         |
| Angola                         | Guinea-Bissau         | Seychelles      |
| Bangladesh                     | Haiti                 | Sierra Leone    |
| Benin                          | Honduras              | Singapore       |
| Bhutan                         | India                 | Solomon Islands |
| Bolivia                        | Indonesia             | Somalia         |
| Botswana                       | Ivory Coast           | Sri Lanka       |
| Brunei                         | Kenya                 | Swaziland       |
| Burkina Faso                   | Kiribati              | Tanzania        |
| Burundi                        | Laos                  | Tibet           |
| Cambodia                       | Lesotho               | Togo            |
| Cameroon                       | Liberia               | Tunisia         |
| Cape Verde                     | Libya                 | Tuvalu          |
| Central African Republic       | Madagascar            | Uganda          |
| Chad                           | Malawi                | Vietnam         |
| China                          | Maldives              | Yemen           |
| Comoros                        | Mali                  | Zambia          |
| Congo                          | Marshall Islands      | Zimbabwe        |
| Democratic Republic of Congo   | Mauritania            |                 |
| Djibouti                       | Mauritius             |                 |
| Dominican Republic             | Mongolia              |                 |
| East Timor                     | Mozambique            |                 |
| Ecuador                        | Namibia               |                 |
| Equatorial Guinea              | Nepal                 |                 |
| Eritrea                        | Niger                 |                 |
| Ethiopia                       | Pakistan              |                 |
| Federated States of Micronesia | Papua New Guinea      |                 |
| Gabon                          | Peru                  |                 |
| Gambia                         | Philippines           |                 |
| Georgia                        | Rwanda                |                 |
| Guatemala                      | Sao Tome and Principe |                 |

Cain KP, Benoit SR, Winston CA, Mac Kenzie WR. Tuberculosis among foreign-born persons in the United States. *JAMA*. 2008;300(4):405–412.

**SUPPLEMENTAL TABLE 7** Countries With Moderate Incidence Rates of Tuberculosis (10–99 Cases per 100 000 Person-Years)

| Country                | Country                  | Country        |
|------------------------|--------------------------|----------------|
| Albania                | Latvia                   | Syria          |
| Algeria                | Lebanon                  | Taiwan         |
| Argentina              | Lithuania                | Tajikistan     |
| Bahrain                | Macedonia                | Thailand       |
| Belarus                | Malaysia                 | Tonga          |
| Belize                 | Mexico                   | Turkey         |
| Bosnia and Herzegovina | Moldova                  | Turkmenistan   |
| Brazil                 | Morocco                  | Ukraine        |
| Bulgaria               | New Caledonia            | Uruguay        |
| Burma (Myanmar)        | Nicaragua                | Uzbekistan     |
| Chile                  | Nigeria                  | Vanuatu        |
| Colombia               | North Korea              | Venezuela      |
| Cook Islands           | Northern Mariana Islands | Western Sahara |
| Costa Rica             | Oman                     |                |
| Croatia                | Palau                    |                |
| Egypt                  | Palestine                |                |
| El Salvador            | Panama                   |                |
| Estonia                | Poland                   |                |
| French Guiana          | Portugal                 |                |
| French Polynesia       | Qatar                    |                |
| Ghana                  | Romania                  |                |
| Guam                   | Russia                   |                |
| Guyana                 | Saudi Arabia             |                |
| Hungary                | Serbia and Montenegro    |                |
| Iran                   | Slovakia                 |                |
| Iraq                   | Slovenia                 |                |
| Japan                  | South Africa             |                |
| Jordan                 | South Korea              |                |
| Kazakhstan             | South Sudan              |                |
| Kuwait                 | Sudan                    |                |
| Kyrgyzstan             | Suriname                 |                |

Cain KP, Benoit SR, Winston CA, Mac Kenzie WR. Tuberculosis among foreign-born persons in the United States. *JAMA*. 2008;300(4):405–412.

**SUPPLEMENTAL TABLE 8** Indeterminate QFT-GIT and Invalid T-SPOT Results for All Participants, by Age Group and Nativity (*N* = 3593)

| Test Result                                        | All Ages | <2 y    | 2–4 y    | 5–9 y    | 10–14 y |
|----------------------------------------------------|----------|---------|----------|----------|---------|
| QFT-GIT, indeterminate, <i>n</i> (%)               | 33 (0.9) | 5 (2.3) | 12 (1.8) | 11 (0.9) | 5 (0.4) |
| T-SPOT, invalid, <i>n</i> (%)                      | 15 (0.4) | 1 (0.5) | 2 (0.3)  | 5 (0.4)  | 7 (0.5) |
| Born in the United States, <i>n</i> = 287          |          |         |          |          |         |
| QFT-GIT, indeterminate, <i>n</i> (%)               | 4 (1.4)  | 0 (0.0) | 2 (4.1)  | 1 (0.9)  | 1 (0.9) |
| T-SPOT, invalid, <i>n</i> (%)                      | 0 (0.0)  | 0 (0.0) | 0 (0.0)  | 0 (0.0)  | 0 (0.0) |
| Born outside of the United States, <i>n</i> = 3304 |          |         |          |          |         |
| QFT-GIT, indeterminate, <i>n</i> (%)               | 29 (0.9) | 5 (2.6) | 10 (1.6) | 10 (0.9) | 4 (0.3) |
| T-SPOT, invalid, <i>n</i> (%)                      | 15 (0.5) | 1 (0.5) | 2 (0.3)  | 5 (0.4)  | 7 (0.5) |

**SUPPLEMENTAL TABLE 9** Single Test Results by Age Group, Nativity, and Contact Status

| Test Results                                    | All Ages   | <2 y      | 2–4 y      | 5–9 y      | 10–14 y    |
|-------------------------------------------------|------------|-----------|------------|------------|------------|
| All participants, <i>n</i> (%)                  |            |           |            |            |            |
| TST+                                            | 958 (26.7) | 65 (29.7) | 165 (24.2) | 271 (21.3) | 457 (32.2) |
| QFT-GIT+ <sup>a</sup>                           | 355 (9.9)  | 3 (1.4)   | 36 (5.3)   | 116 (9.2)  | 200 (14.1) |
| T-SPOT+ <sup>a</sup>                            | 251 (7.1)  | 1 (0.5)   | 17 (2.5)   | 82 (6.5)   | 151 (11.0) |
| Born in the United States, <i>n</i> (%)         |            |           |            |            |            |
| TST+                                            | 57 (19.9)  | 0 (0.0)   | 11 (22.4)  | 24 (22.4)  | 22 (20.0)  |
| QFT-GIT+                                        | 51 (18.0)  | 1 (5.0)   | 9 (18.4)   | 20 (18.9)  | 21 (19.3)  |
| T-SPOT+                                         | 33 (11.5)  | 0 (0.0)   | 6 (12.2)   | 14 (13.1)  | 13 (11.8)  |
| Born outside of the United States, <i>n</i> (%) |            |           |            |            |            |
| TST+                                            | 901 (27.3) | 65 (33.0) | 154 (24.4) | 247 (21.2) | 435 (33.2) |
| QFT-GIT+ <sup>a</sup>                           | 304 (9.3)  | 2 (1.0)   | 27 (4.3)   | 96 (8.3)   | 179 (13.7) |
| T-SPOT+ <sup>a</sup>                            | 218 (6.8)  | 1 (0.5)   | 11 (1.8)   | 68 (5.9)   | 138 (10.9) |
| Contacts, <i>n</i> (%)                          |            |           |            |            |            |
| TST+                                            | 100 (26.5) | 1 (4.2)   | 19 (28.4)  | 42 (29.6)  | 38 (26.2)  |
| QFT-GIT+                                        | 66 (17.6)  | 1 (4.3)   | 9 (13.4)   | 28 (19.9)  | 28 (19.4)  |
| T-SPOT+                                         | 44 (11.8)  | 0 (0.0)   | 6 (9.0)    | 20 (14.2)  | 18 (12.7)  |
| Noncontacts, <i>n</i> (%)                       |            |           |            |            |            |
| TST+                                            | 858 (26.7) | 64 (32.8) | 146 (23.8) | 229 (20.2) | 419 (32.9) |
| QFT-GIT+ <sup>a</sup>                           | 289 (9.0)  | 2 (1.0)   | 27 (4.4)   | 88 (7.9)   | 172 (13.5) |
| T-SPOT+ <sup>a</sup>                            | 207 (6.6)  | 1 (0.5)   | 11 (1.8)   | 62 (5.6)   | 133 (10.8) |

+, positive.

<sup>a</sup>  $P < .001$  for association of positive results with increasing age.**SUPPLEMENTAL TABLE 10** Agreement Between TST and IGRA Results by Nativity and Age Group

| Nativity and Age Group                          | Test Result Combination, TST-IGRA |            |          |             | No. Participants | Concordance, % | $\kappa$ |
|-------------------------------------------------|-----------------------------------|------------|----------|-------------|------------------|----------------|----------|
|                                                 | + and +                           | + and –    | – and +  | – and –     |                  |                |          |
| All participants, <i>n</i> (%)                  | 306 (8.5)                         | 652 (18.1) | 63 (1.8) | 2572 (71.6) | 3593             | 80.1           | 0.37     |
| Born in the United States, <i>n</i> (%)         |                                   |            |          |             |                  |                |          |
| <2 y                                            | 0 (0.0)                           | 0 (0.0)    | 1 (4.8)  | 20 (95.2)   | 21               | 95.2           | NC       |
| 2–4 y                                           | 9 (18.4)                          | 2 (4.1)    | 0 (0.0)  | 38 (77.6)   | 49               | 95.9           | 0.87     |
| 5–9 y                                           | 18 (16.8)                         | 6 (5.6)    | 2 (1.9)  | 81 (75.7)   | 107              | 92.5           | 0.77     |
| 10–14 y                                         | 16 (14.5)                         | 6 (5.5)    | 6 (5.5)  | 82 (74.5)   | 110              | 89.1           | 0.66     |
| Born outside of the United States, <i>n</i> (%) |                                   |            |          |             |                  |                |          |
| <2 y                                            | 1 (0.5)                           | 64 (32.5)  | 1 (0.5)  | 131 (66.5)  | 197              | 67.0           | 0.01     |
| 2–4 y                                           | 22 (3.5)                          | 132 (20.9) | 5 (0.8)  | 472 (74.8)  | 631              | 78.3           | 0.18     |
| 5–9 y                                           | 79 (6.8)                          | 168 (14.4) | 22 (1.9) | 897 (76.9)  | 1166             | 83.7           | 0.38     |
| 10–14 y                                         | 161 (12.3)                        | 274 (20.9) | 26 (2.0) | 849 (64.8)  | 1310             | 77.1           | 0.40     |

NC, not calculable; –, negative; +, positive.

**SUPPLEMENTAL TABLE 11** QFT-GIT and T-SPOT Results for Participants With Positive IGRA Results, by Age Group and Nativity

| Test Results                                    | All Ages   | <2 y      | 2–4 y     | 5–9 y     | 10–14 y    |
|-------------------------------------------------|------------|-----------|-----------|-----------|------------|
| Born in the United States, <i>n</i> (%)         |            |           |           |           |            |
| QFT-GIT+ and T-SPOT+                            | 32 (61.5)  | 0 (0.0)   | 6 (66.7)  | 14 (70.0) | 12 (54.6)  |
| QFT-GIT+ and T-SPOT–                            | 19 (36.5)  | 1 (100.0) | 3 (33.3)  | 6 (30.0)  | 9 (40.9)   |
| QFT-GIT– and T-SPOT+                            | 1 (1.9)    | 0 (0.0)   | 0 (0.0)   | 0 (0.0)   | 1 (4.6)    |
| Born outside of the United States, <i>n</i> (%) |            |           |           |           |            |
| QFT-GIT+ and T-SPOT+                            | 205 (65.1) | 1 (50.0)  | 11 (40.7) | 63 (62.4) | 130 (70.3) |
| QFT-GIT+ and T-SPOT–                            | 91 (28.9)  | 1 (50.0)  | 16 (59.3) | 32 (31.7) | 42 (22.7)  |
| QFT-GIT+ and T-SPOT missing                     | 6 (1.9)    | 0 (0.0)   | 0 (0.0)   | 1 (1.0)   | 5 (2.7)    |
| QFT-GIT– and T-SPOT+                            | 13 (4.1)   | 0 (0.0)   | 0 (0.0)   | 5 (5.0)   | 8 (4.3)    |

–, negative; +, positive.
